# Supplementary material for: Polymorphism and Divergence in Two Willow Species, Salix viminalis L. and Salix schwerinii E. Wolf
Source: PubMed Central journal article supplement (PMC3276148; doi:10.1534/g3.111.000539), 2011-10-01
Supplement: supp_1.5.387_000539.pdf [file supp_1.5.387_000539.pdf]

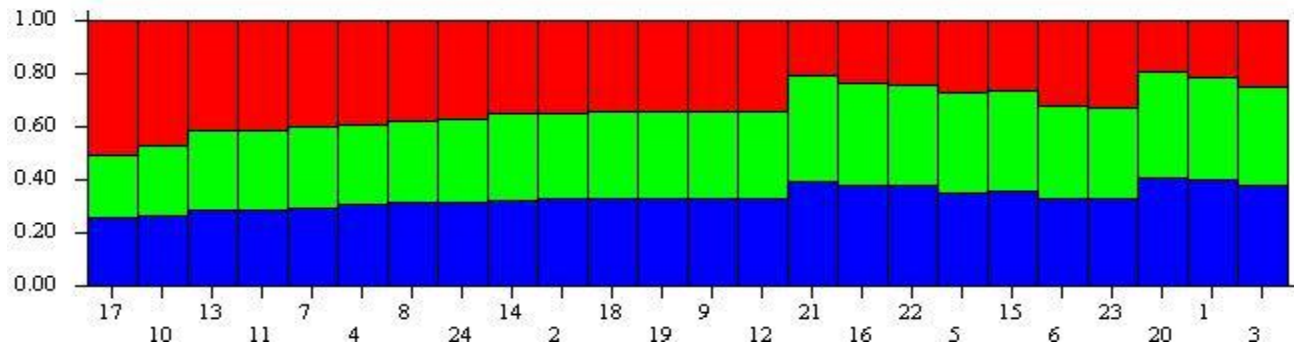

**Figure S1a** Structure analysis of *S. schwerinii* when K = 3 clusters are assumed.

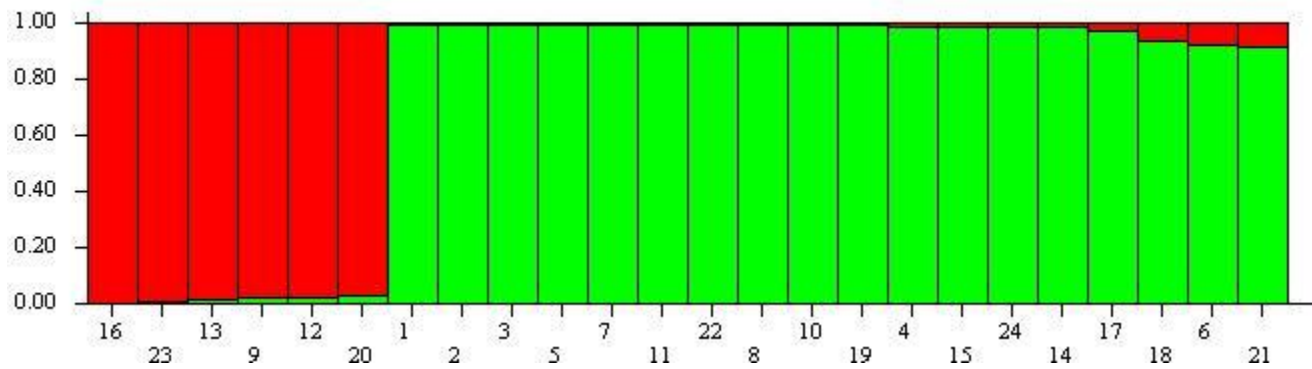

**Figure S1b** Structure analysis of *S. viminalis* when K = 2 clusters are assumed.

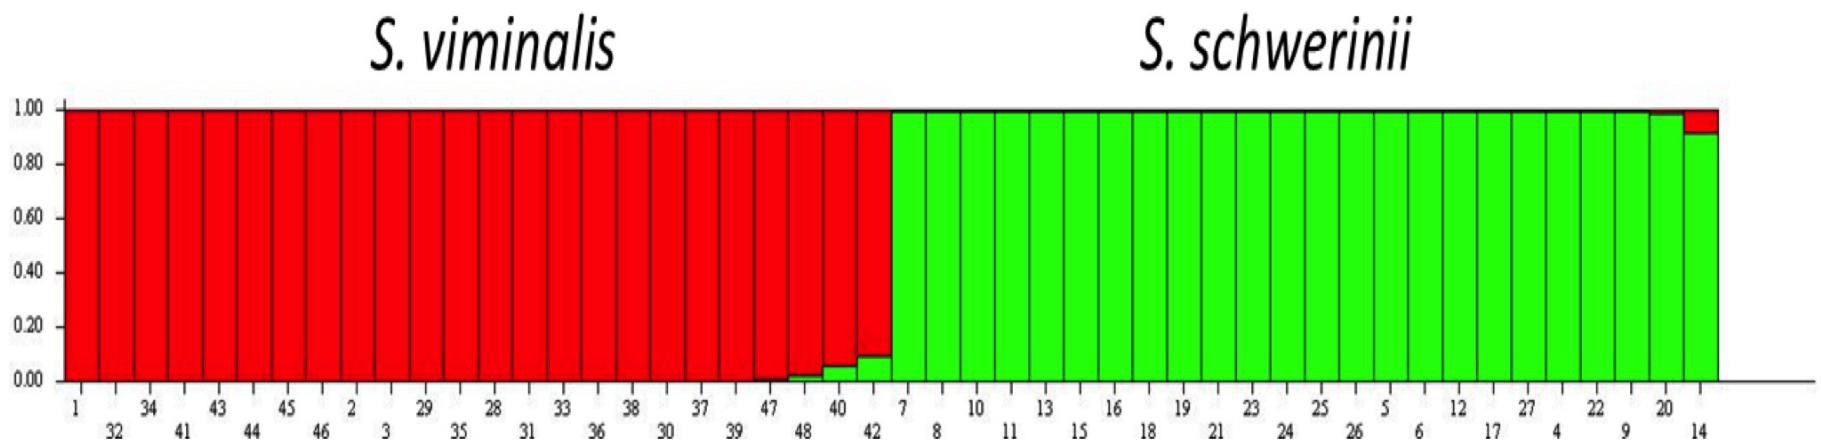

**Figure S1c** Structure analysis of *S. viminalis* and *S. schwerinii* when K = 2 clusters are assumed.

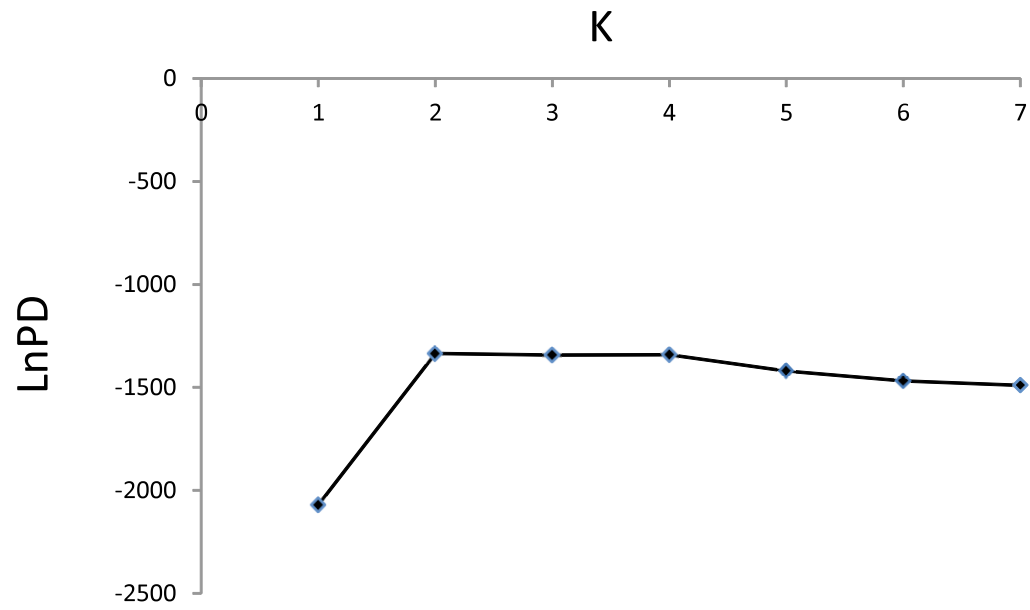

**Figure S2a** Estimated number of clusters (K) obtained with Structure when *S. schwerinii* and *S. viminalis* were run together. The mean LnPD is plotted over K (1-7).

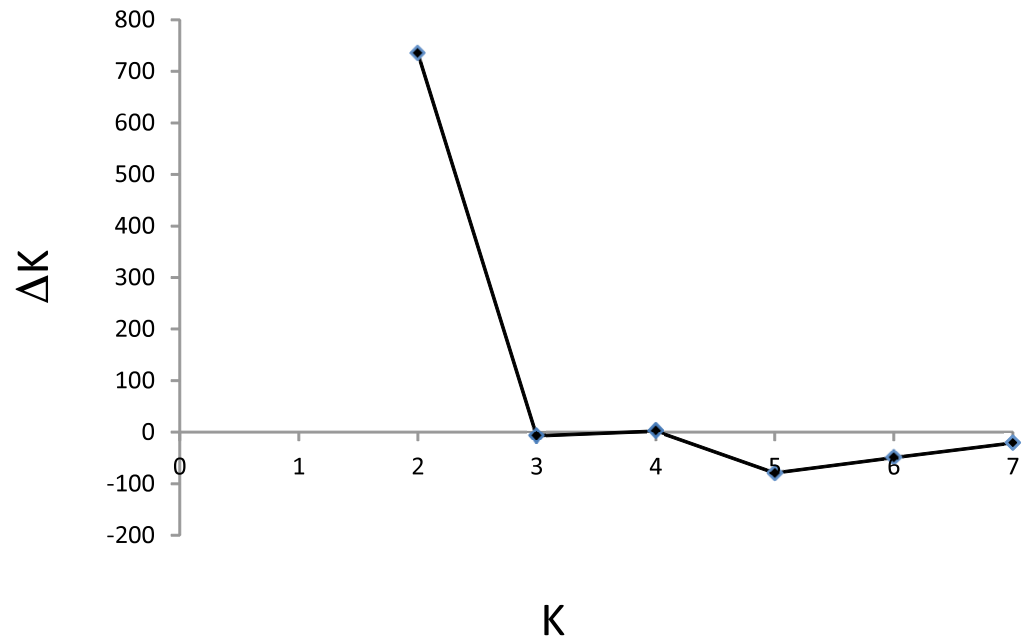

**Figure S2b** Estimated number of clusters (K) obtained with Structure when *S. schwerinii* and *S. viminalis* were run together. The mean  $\Delta K$  is plotted over K (1-7).

**Table S1 Sample origins and clone names**

| Species              | Lab name | Sample name | Origin                                                                      | Note     |
|----------------------|----------|-------------|-----------------------------------------------------------------------------|----------|
| <i>S. viminalis</i>  | V18      | 78183       | Skåne, Sweden                                                               |          |
| <i>S. viminalis</i>  | V19      | 78195       | Western Sweden                                                              |          |
| <i>S. viminalis</i>  | V52      | 81084       | Southeast Sweden                                                            |          |
| <i>S. viminalis</i>  | V8       | 78054       | Western Sweden                                                              |          |
| <i>S. viminalis</i>  | V14      | 78115       | Southeast Sweden                                                            |          |
| <i>S. viminalis</i>  | V32      | 80019       | North of malardalen Sweden                                                  |          |
| <i>S. viminalis</i>  | V40      | 80069       | Denmark                                                                     |          |
| <i>S. viminalis</i>  | V56      | 81102       | Netherland                                                                  |          |
| <i>S. viminalis</i>  | V59      | 82008       | Skåne, Sweden                                                               |          |
| <i>S. viminalis</i>  | V69      | 82046       | Ireland                                                                     |          |
| <i>S. viminalis</i>  | V76      | Bel34       | Belgium                                                                     |          |
| <i>S. viminalis</i>  | V85      | Bel74       | Belgium                                                                     |          |
| <i>S. viminalis</i>  | V94      | D161        | Germany                                                                     |          |
| <i>S. viminalis</i>  | V100     | D252        | Germany                                                                     |          |
| <i>S. viminalis</i>  | V117     | Linköp2A    | Sweden                                                                      |          |
| <i>S. viminalis</i>  | V119     | P63         | Poland                                                                      |          |
| <i>S. viminalis</i>  | V121     | P106        | Poland                                                                      |          |
| <i>S. viminalis</i>  | V126     | P182        | Poland                                                                      |          |
| <i>S. viminalis</i>  | V136     | skarp4      | Sweden                                                                      |          |
| <i>S. viminalis</i>  | V140     | T19         | Germany                                                                     |          |
| <i>S. viminalis</i>  | V142     | T76         | Germany                                                                     |          |
| <i>S. viminalis</i>  | V145     | T114        | Germany                                                                     |          |
| <i>S. viminalis</i>  | V147     | Öland7      | Öland, Sweden                                                               |          |
| <i>S. viminalis</i>  | V208     | 90040       | Sweden                                                                      |          |
| <i>S. schwerinii</i> | S1       | 96-1-40     | parents: SW910260 + SW910259 collected at river Ingoda at the bridge Tchita | F1 cross |
| <i>S. schwerinii</i> | S2       | 96-2-18     | parents: SW910261 + SW910267 collected at river Ingoda at the bridge Tchita | F1 cross |

|                      |     |          |                                                                                       |          |
|----------------------|-----|----------|---------------------------------------------------------------------------------------|----------|
| <i>S. schwerinii</i> | S3  | 96-5-6   | parents: SW910282 + SW910284 collected at river Mongoi, village Mohov-Kondin          | F1 cross |
| <i>S. schwerinii</i> | S4  | 96-6-15  | parents: SW910287 + SW910285 collected at river Mongoi, village Mohov Kondin          | F1 cross |
| <i>S. schwerinii</i> | S5  | 96-10-37 | parents: SW910301+ SW910300 collected at river Vitim village Romanovka                | F1 cross |
| <i>S. schwerinii</i> | S6  | 96-11-16 | parents: SW910312 + SW910317 collected at the rivers Vitim & Bisjaga, village Bodaibo | F1 cross |
| <i>S. schwerinii</i> | S7  | 96-12-3  | parents: SW910314 + SW910316 collected at the rivers Vitim & Bisjaga, village Bodaibo | F1 cross |
| <i>S. schwerinii</i> | S8  | 96-13-31 | parents: SW910323 + SW910324 collected at the rivers Vitim & Bisjaga, village Bodaibo | F1 cross |
| <i>S. schwerinii</i> | S9  | 96-14-40 | parents: SW910326 + SW910327 collected at river Tchitinka, village Tchita             | F1 cross |
| <i>S. schwerinii</i> | S10 | 96-16-31 | parents: SW910335 + SW910334 collected at river Tchitinka, village Tchita             | F1 cross |
| <i>S. schwerinii</i> | S11 | 96-19-14 | parents: SW910340 + SW910341 collected at rivers Shilka & Nertcha near to Nerchinsk   | F1 cross |
| <i>S. schwerinii</i> | S12 | 96-20-23 | parents: SW910343 + SW910344 collected at rivers Shilka & Nertcha near to Nerchinsk   | F1 cross |
| <i>S. schwerinii</i> | S13 | 96-21-20 | parents: SW910345 + SW910348 collected at rivers Shilka & Nertcha near to Nerchinsk   | F1 cross |
| <i>S. schwerinii</i> | S14 | 96-22-24 | parents: SW910349 + SW910350 collected at rivers Shilka & Nertcha near to Nerchinsk   | F1 cross |
| <i>S. schwerinii</i> | S15 | 96-24-11 | parents: SW910356 + SW910352 collected at rivers Shilka & Nertcha near to Nerchinsk   | F1 cross |
| <i>S. schwerinii</i> | S16 | 96-25-31 | parents: SW910368 + SW910369 collected at river Amur near Pokrova                     | F1 cross |
| <i>S. schwerinii</i> | S17 | 96-26-19 | parents: SW910371+ SW910372 collected at river Amur near Pokrova                      | F1 cross |
| <i>S. schwerinii</i> | S18 | SW911310 | collected at Vitim o Bisjaga                                                          |          |
| <i>S. schwerinii</i> | S19 | SW911295 | collected at river Vitim                                                              |          |
| <i>S. schwerinii</i> | S20 | SW911273 | collected at river Mongoi                                                             |          |
| <i>S. schwerinii</i> | S21 | SW911329 | collected at river Tchitinka                                                          |          |
| <i>S. schwerinii</i> | S22 | SW911283 | collected at river Mongoi                                                             |          |
| <i>S. schwerinii</i> | S23 | SW911347 | collected at rivers Shilka o Nertcha                                                  |          |
| <i>S. schwerinii</i> | S24 | SW911358 | collected at river Amur                                                               |          |

**Table S2 Primer sequences**

| Gene   | Segment | Forward PCR primer 5' to 3' | Reverse PCR primer 5' to 3' |
|--------|---------|-----------------------------|-----------------------------|
| I-1    | I-1A    | TGATGGAAGACCTTTGTCTGG       | GTCCAGCACAGCCTTTTTGT        |
|        | I-1B    | CTTGTTTCGCAATCCAACACC       | GGTTTGCTTGTTTCCACTGTC       |
| I-53   | I-53B*  | CAGGTTTTGTGTGAGCTGGA        | AGCAGGGCTCAGTGAATTGT        |
| II-33  | II-33A  | AGGCTTTGCTTCTTTGGTCA        | GCTGGACTTCCCAACATTAG        |
|        | II-33B  | TAAGCATGTTTTACCTGTGC        | GCAGCATCCCTCAAATCAAT        |
| II-36  | II-36A  | TGCTGTTATTTGTTGTATGCAC      | TCAGCAAATTGTAGCAAATGAA      |
|        | II-36B  | TGAAGCAACAGTCCAGGTG         | GGGTGAGGAAAAGTCAACCA        |
| III-4  | III-4A  | TTGTCTTCATGGTCGTGCAT        | CAGCTTCCATAAAGCGTTC         |
|        | III-4B  | ACTGGAGCTGTTGTGCCTTT        | CCACCAAGAGAGTGCCTTAC        |
| III-24 | III-24A | CCTGAATTGATGGCTGCATT        | CACTTAGGCCCGGCAAATT         |
|        | III-24B | ATGATGGACGCAACAAAAC         | TAGCCTTGGCCTCTTGAGAAG       |
| IV-11  | IV-11A  | TGGTCACCACAAATTCGTCT        | CATCTGCTGAGGACATGATTG       |
|        | IV-11B  | CATGCCTCTCTCGTTTCTC         | AGTGCAAGCATGGGAAGTTG        |
| IV-18  | IV-18A  | GTACAAGGCCGTGTTCTGT         | GCCATCGTCAGCTCAAAC          |
|        | IV-18B  | GAGTATCAGGAAATTGCAAGGC      | CTGCTGAAGCTGCTTAGCTG        |
| V-18   | V-18A   | TGCTATCATGTTGCCATGTG        | TGGGCAAGTTTCCATCATAAG       |
|        | V-18B   | GATTCTGGAATAGTCGATTC        | CAAGTTTCCATCATAAGTGC        |
| V-20   | V-20A   | CCAAGGCTTTTATGGTGCAT        | GAACTCCATCACCAAATTCCA       |
|        | V-20B   | GCATGCAAGAAACAGGGTTTAC      | AAGGATTGCATCCATTGCAG        |
| VI-4   | VI-4A   | CAAGGATTGCTTGCCATGT         | TGGCACAACAAATTCAGCTC        |
|        | VI-4B   | GTGCTTCCACTTCGTGACTG        | ATTGCAAATGGGACAGAACA        |
| VII-1  | VII-1A  | GGCAGCAGAACCAAGAAGA         | TTCCTGGTGGCTAAAGTGGT        |
|        | VII-1B  | CGATCCTGATGCTGCTGATA        | GACAACAGTGGGAGCATCAA        |
| VII-11 | VII-11A | TTGGGAGAAGCTTTGCAACT        | GGTGCAAAAGCATTGTGGA         |
|        | VII-11B | ATTTTGGGCTTGGATTGTGA        | TTGAGGTACATTGGCAGCAA        |
| VIII-5 | VIII-5A | TGGATTTCTGGACCAGGCTAC       | GACAGGAGAATAGGAGCTTCG       |

|         |           |                       |                       |
|---------|-----------|-----------------------|-----------------------|
|         | VIII-5B   | TGCCATTCTACACCGAGTTG  | AACCTGAAACCAGAGCACAG  |
| VIII-14 | VIII-14A  | AAACTCCTGGAGAGGCAGG   | CTGCACAAAGTCCATGTAGTC |
|         | VIII-14B  | TGCTTGGTGCTGACTTTTATG | ATGACCGTAACACCAGATCG  |
| VIII-22 | VIII-22B* | TCATGTCATTGAGGGTCGAA  | TCCTGGTCTCCATCTGCATC  |
| X-27    | X-27A     | TGTCAATGCCAAACCTTGAA  | TTCAGTGGCTGGAACCTTCT  |
|         | X-27B     | ACAGCCAAAACCAACTCCG   | ATCTCTCGTGGCACCTATGGA |
| XII-8   | XII-8A    | GGCATATTCTCTCCCTTGATG | GGGAGCCAGTTACCACCATA  |
|         | XII-8B    | TGGTGACGATGAAGGCATTA  | GGGTTCAGTCTTTGGAAGCA  |

---

\*Only one segment per gene.



**Table S3 P-values of obtaining multilocus summary statistic of the data under the individual species models. P-values are not corrected for multiple tests**

| Statistic            | <i>S. schwerinii</i> |        |         | <i>S. viminalis</i> |        |         |
|----------------------|----------------------|--------|---------|---------------------|--------|---------|
|                      | Bottleneck           | Growth | Neutral | Bottleneck          | Growth | Neutral |
| Mean(S)              | 0,85                 | 0,33   | 0,65    | 0,30                | 0,61   | 0,60    |
| Mean(num_singleton)  | 0,46                 | 0,08   | 0,20    | 0,08                | 0,13   | 0,13    |
| Mean( $\pi_w$ )      | 0,76                 | 0,23   | 0,47    | 0,24                | 0,48   | 0,46    |
| Mean(TajD)           | 0,99                 | 0,99   | 1       | 0,93                | 0,91   | 0,90    |
| Mean(FuLiF*)         | 0,99                 | 0,99   | 0,99    | 0,97                | 0,96   | 0,96    |
| Mean(FuLiD*)         | 0,95                 | 0,97   | 0,95    | 0,97                | 0,96   | 0,96    |
| Mean(num_haplotypes) | 0,76                 | 0,23   | 0,70    | 0,30                | 0,58   | 0,55    |
| Mean(DandVH)         | 0,68                 | 0,16   | 0,52    | 0,11                | 0,21   | 0,15    |
| Mean(WallsB)         | 0,61                 | 0,71   | 0,50    | 0,94                | 0,91   | 0,91    |
| Mean(WallsQ)         | 0,60                 | 0,64   | 0,46    | 0,95                | 0,94   | 0,94    |
| Var(S)               | 0,98                 | 0,94   | 0,97    | 0,82                | 0,88   | 0,88    |
| Var(num_singleton)   | 0,71                 | 0,41   | 0,54    | 0,35                | 0,50   | 0,49    |
| Var( $\pi_w$ )       | 0,60                 | 0,25   | 0,38    | 0,32                | 0,46   | 0,44    |
| Var(TajD)            | 0,88                 | 0,96   | 0,88    | 0,98                | 0,98   | 0,97    |
| Var(FuLiF*)          | 0,39                 | 0,53   | 0,41    | 0,77                | 0,74   | 0,75    |

|                     |      |      |      |      |      |      |
|---------------------|------|------|------|------|------|------|
| Var(FuLiD*)         | 0,13 | 0,20 | 0,14 | 0,66 | 0,64 | 0,66 |
| Var(num_haplotypes) | 0,92 | 0,92 | 0,95 | 0,91 | 0,90 | 0,90 |
| Var(DandVH)         | 0,23 | 0,60 | 0,37 | 0,88 | 0,80 | 0,82 |
| Var(WallsB)         | 0,50 | 0,76 | 0,48 | 0,69 | 0,57 | 0,55 |
| Var(WallsQ)         | 0,46 | 0,70 | 0,42 | 0,60 | 0,48 | 0,45 |

---

**TABLE S4** Number of outlier loci in the validation of the per species ABC models. Loci were considered outlier when two-sided P-value < 0.05. P values are not corrected for multiple tests.

| Statistic            | S. schwerinii |        |         | S. viminalis |        |         |
|----------------------|---------------|--------|---------|--------------|--------|---------|
|                      | Bottleneck    | Growth | Neutral | Bottleneck   | Growth | Neutral |
| Segregating sites    | 2             | 1      | 2       | 1            | 1      | 1       |
| Singletons           | 0             | 0      | 0       | 0            | 0      | 0       |
| Wattersons theta     | 2             | 1      | 2       | 1            | 1      | 1       |
| Tajimas D            | 4             | 4      | 4       | 2            | 2      | 2       |
| Fu & Li F*           | 3             | 3      | 3       | 2            | 2      | 2       |
| Fu & Li D*           | 1             | 1      | 1       | 2            | 2      | 2       |
| Number of haplotypes | 1             | 1      | 1       | 2            | 2      | 3       |

**Table S5** Outlier loci in the validation of ABC models. Number of statistics for which the loci were considered to be outlier at  $\alpha=0.05$  level, without correction for multiple tests.

| Locus   | Bottleneck | S. schwerinii<br>Growth | Neutral | Bottleneck | S. viminalis<br>Growth | Neutral | Split | Split without<br>migration | No split |
|---------|------------|-------------------------|---------|------------|------------------------|---------|-------|----------------------------|----------|
| I-1     | 1          | 1                       | 1       | 3          | 3                      | 3       | 3     | 3                          | 6        |
| I-53b   |            |                         |         |            |                        |         |       |                            | 3        |
| II-33   |            |                         |         |            |                        |         |       |                            | 3        |
| II-36   |            |                         |         | 2          | 2                      | 2       |       |                            | 4        |
| III-4c  |            |                         |         |            |                        |         | 3     | 2                          | 3        |
| IV-11   |            |                         |         |            |                        |         |       |                            | 3        |
| IV-18   | 5          | 4                       | 5       |            |                        |         |       | 1                          | 7        |
| V-18b   |            |                         |         |            |                        |         |       |                            | 2        |
| VI-4    | 2          | 2                       | 2       | 3          | 3                      | 3       |       |                            | 5        |
| VII-11  | 3          | 3                       | 3       |            |                        | 1       | 3     | 1                          | 2        |
| VII-1   |            |                         |         | 2          | 2                      | 2       |       |                            | 3        |
| VIII-14 |            |                         |         |            |                        |         |       | 1                          | 2        |
| VIII-5  |            |                         |         |            |                        |         |       |                            | 2        |
| X-27    | 2          | 2                       | 2       |            |                        |         |       |                            | 4        |

**Table S6** Number of outlier loci in the validation of the population split ABC models. Loci were considered outlier when two-sided P-value < 0.05. P values are not corrected for multiple tests.

| Statistic                                                       | Split | Split without migration | No split |
|-----------------------------------------------------------------|-------|-------------------------|----------|
| Segregating sites <i>S. schwerinii</i>                          |       |                         |          |
| Singletons <i>S. schwerinii</i>                                 |       |                         |          |
| Wattersons theta <i>S. schwerinii</i>                           |       |                         |          |
| Tajimas D <i>S. schwerinii</i>                                  |       |                         | 4        |
| Fu & Li F* <i>S. schwerinii</i>                                 |       |                         | 3        |
| Fu & Li D* <i>S. schwerinii</i>                                 |       | 1                       | 1        |
| Number of haplotypes <i>S. schwerinii</i>                       | 1     | 1                       |          |
| Segregating sites <i>S. viminalis</i>                           |       |                         |          |
| Singleton <i>S. viminalis</i>                                   |       |                         |          |
| Wattersons theta <i>S. viminalis</i>                            |       |                         |          |
| Tajimas D <i>S. viminalis</i>                                   | 1     | 1                       | 4        |
| Fu & Li F* <i>S. viminalis</i>                                  | 1     | 1                       | 3        |
| Fu & Li D* <i>S. viminalis</i>                                  | 1     | 1                       | 2        |
| Number of haplotypes <i>S. viminalis</i>                        |       |                         |          |
| Segregating sites <i>S. schwerinii</i> + <i>S. viminalis</i>    |       |                         |          |
| Singletons <i>S. schwerinii</i> + <i>S. viminalis</i>           | 2     |                         |          |
| Wattersons theta <i>S. schwerinii</i> + <i>S. viminalis</i>     |       |                         |          |
| Tajimas D <i>S. schwerinii</i> + <i>S. viminalis</i>            | 1     | 1                       | 2        |
| Fu & Li F* <i>S. schwerinii</i> + <i>S. viminalis</i>           | 1     | 1                       | 1        |
| Fu & Li D* <i>S. schwerinii</i> + <i>S. viminalis</i>           |       |                         | 1        |
| Number of haplotypes <i>S. schwerinii</i> + <i>S. viminalis</i> | 1     |                         |          |
| Fst                                                             |       | 1                       | 14       |
| Number of shared polymorphisms                                  |       |                         |          |
| Number of fixed polymorphisms                                   |       |                         | 14       |
| Number of private polymorphisms <i>S. schwerinii</i>            |       |                         |          |
| Number of private polymorphisms <i>S. viminalis</i>             |       |                         |          |

**Table S7 P-values of obtaining multilocus summary statistic of the data under three different models. P values are not corrected for multiple tests.**

| Stat                                          | Split | Split no migration | No split |
|-----------------------------------------------|-------|--------------------|----------|
| Mean( $S_{S. schwerinii}$ )                   | 0.72  | 0.43               | 0.87     |
| Mean( $\text{singleton}_{S. schwerinii}$ )    | 0.71  | 0.47               | 0.86     |
| Mean( $\pi w_{S. schwerinii}$ )               | 0.67  | 0.36               | 0.87     |
| Mean( $\text{TajD}_{S. schwerinii}$ )         | 0.85  | 0.80               | 0.93     |
| Mean( $\text{FuLiF}^*_{S. schwerinii}$ )      | 0.72  | 0.57               | 0.88     |
| Mean( $\text{FuLiD}^*_{S. schwerinii}$ )      | 0.61  | 0.42               | 0.74     |
| Mean( $\text{num\_haplo}_{S. schwerinii}$ )   | 0.72  | 0.40               | 0.89     |
| Mean( $\text{DandVH}_{S. schwerinii}$ )       | 0.64  | 0.31               | 0.88     |
| Mean( $\text{WallsB}_{S. schwerinii}$ )       | 0.38  | 0.23               | 0.52     |
| Mean( $\text{WallsQ}_{S. schwerinii}$ )       | 0.39  | 0.22               | 0.54     |
| Mean( $S_{S. viminalis}$ )                    | 0.68  | 0.52               | 0.87     |
| Mean( $\text{singleton}_{S. viminalis}$ )     | 0.63  | 0.57               | 0.85     |
| Mean( $\pi w_{S. viminalis}$ )                | 0.65  | 0.48               | 0.86     |
| Mean( $\text{TajD}_{S. viminalis}$ )          | 0.46  | 0.25               | 0.79     |
| Mean( $\text{FuLiF}^*_{S. viminalis}$ )       | 0.59  | 0.38               | 0.80     |
| Mean( $\text{FuLiD}^*_{S. viminalis}$ )       | 0.64  | 0.46               | 0.75     |
| Mean( $\text{num\_haplo}_{S. viminalis}$ )    | 0.59  | 0.49               | 0.87     |
| Mean( $\text{DandVH}_{S. viminalis}$ )        | 0.45  | 0.32               | 0.86     |
| Mean( $\text{WallsB}_{S. viminalis}$ )        | 0.66  | 0.43               | 0.81     |
| Mean( $\text{WallsQ}_{S. viminalis}$ )        | 0.69  | 0.45               | 0.85     |
| Mean( $S_{\text{combined}}$ )                 | 0.61  | 0.44               | 0.88     |
| Mean( $\text{singleton}_{\text{combined}}$ )  | 0.73  | 0.53               | 0.87     |
| Mean( $\pi w_{\text{combined}}$ )             | 0.55  | 0.35               | 0.88     |
| Mean( $\text{TajD}_{\text{combined}}$ )       | 0.56  | 0.68               | 0.92     |
| Mean( $\text{FuLiF}^*_{\text{combined}}$ )    | 0.52  | 0.56               | 0.89     |
| Mean( $\text{FuLiD}^*_{\text{combined}}$ )    | 0.49  | 0.47               | 0.73     |
| Mean( $\text{num\_haplo}_{\text{combined}}$ ) | 0.68  | 0.42               | 0.91     |
| Mean( $\text{DandVH}_{\text{combined}}$ )     | 0.52  | 0.29               | 0.90     |

|                                          |      |      |      |
|------------------------------------------|------|------|------|
| Mean(WallsB <sub>combined</sub> )        | 0.23 | 0.18 | 0.54 |
| Mean(WallsQ <sub>combined</sub> )        | 0.24 | 0.19 | 0.55 |
| Mean(Fst)                                | 0.44 | 0.57 | 1.00 |
| Mean(shared)                             | 0.68 | 0.49 | 0.81 |
| Mean(fixed)                              | 0.30 | 0.26 | 1.00 |
| Mean(private <sub>S. schwerinii</sub> )  | 0.76 | 0.46 | 0.90 |
| Mean(private <sub>S. viminalis</sub> )   | 0.70 | 0.58 | 0.90 |
| Var(S <sub>S. schwerinii</sub> )         | 0.86 | 0.78 | 0.89 |
| Var(singleton <sub>S. schwerinii</sub> ) | 0.73 | 0.58 | 0.87 |
| Var( $\pi$ w <sub>S. schwerinii</sub> )  | 0.58 | 0.32 | 0.87 |
| Var(TajD <sub>S. schwerinii</sub> )      | 0.77 | 0.86 | 0.81 |
| Var(FuLiF* <sub>S. schwerinii</sub> )    | 0.44 | 0.57 | 0.52 |
| Var(FuLiD* <sub>S. schwerinii</sub> )    | 0.24 | 0.35 | 0.46 |
| Var(num_haplo <sub>S. schwerinii</sub> ) | 0.97 | 0.93 | 0.91 |
| Var(DandVH <sub>S. schwerinii</sub> )    | 0.26 | 0.52 | 0.45 |
| Var(WallsB <sub>S. schwerinii</sub> )    | 0.34 | 0.40 | 0.69 |
| Var(WallsQ <sub>S. schwerinii</sub> )    | 0.34 | 0.41 | 0.69 |
| Var(S <sub>S. viminalis</sub> )          | 0.78 | 0.65 | 0.88 |
| Var(singleton <sub>S. viminalis</sub> )  | 0.70 | 0.64 | 0.86 |
| Var( $\pi$ w <sub>S. viminalis</sub> )   | 0.60 | 0.42 | 0.86 |
| Var(TajD <sub>S. viminalis</sub> )       | 0.91 | 0.87 | 0.95 |
| Var(FuLiF* <sub>S. viminalis</sub> )     | 0.74 | 0.76 | 0.77 |
| Var(FuLiD* <sub>S. viminalis</sub> )     | 0.71 | 0.76 | 0.66 |
| Var(num_haplo <sub>S. viminalis</sub> )  | 0.66 | 0.62 | 0.90 |
| Var(DandVH <sub>S. viminalis</sub> )     | 0.54 | 0.65 | 0.82 |
| Var(WallsB <sub>S. viminalis</sub> )     | 0.48 | 0.36 | 0.74 |
| Var(WallsQ <sub>S. viminalis</sub> )     | 0.43 | 0.34 | 0.74 |
| Var(S <sub>combined</sub> )              | 0.90 | 0.87 | 0.89 |
| Var(singleton <sub>combined</sub> )      | 0.93 | 0.89 | 0.89 |
| Var( $\pi$ w <sub>combined</sub> )       | 0.39 | 0.23 | 0.87 |
| Var(TajD <sub>combined</sub> )           | 0.85 | 0.91 | 0.72 |

|                                        |      |      |      |
|----------------------------------------|------|------|------|
| Var(FuLiF* <sub>combined</sub> )       | 0.85 | 0.88 | 0.62 |
| Var(FuLiD* <sub>combined</sub> )       | 0.71 | 0.74 | 0.52 |
| Var(num_haplo <sub>combined</sub> )    | 0.98 | 0.95 | 0.92 |
| Var(DandVH <sub>combined</sub> )       | 0.60 | 0.73 | 0.42 |
| Var(WallsB <sub>combined</sub> )       | 0.31 | 0.40 | 0.69 |
| Var(WallsQ <sub>combined</sub> )       | 0.37 | 0.46 | 0.70 |
| Var(Fst)                               | 0.75 | 0.80 | 1.00 |
| Var(shared)                            | 0.76 | 0.61 | 0.86 |
| Var(fixed)                             | 0.28 | 0.24 | 1.00 |
| Var(private <sub>S. schwerinii</sub> ) | 0.89 | 0.81 | 0.90 |
| Var(private <sub>S. viminalis</sub> )  | 0.77 | 0.69 | 0.90 |

---
