# Supplementary material for: Polymorphism and Divergence in Two Willow Species, Salix viminalis L. and Salix schwerinii E. Wolf
Source: PubMed Central journal article supplement (PMC3276148; doi:10.1534/g3.111.000539), 2011-10-01
Supplement: supp_1.5.387_FigureS1.pdf [file supp_1.5.387_FigureS1.pdf]

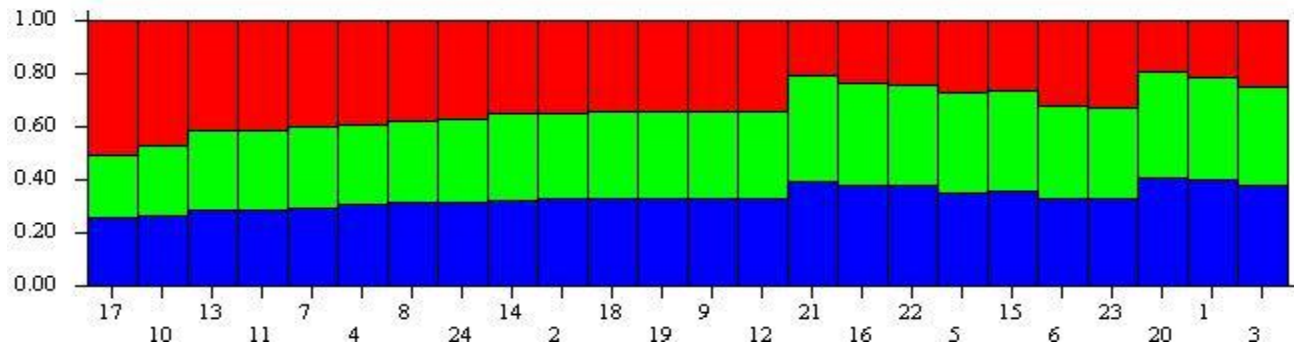

**Figure S1a** Structure analysis of *S. schwerinii* when K = 3 clusters are assumed.

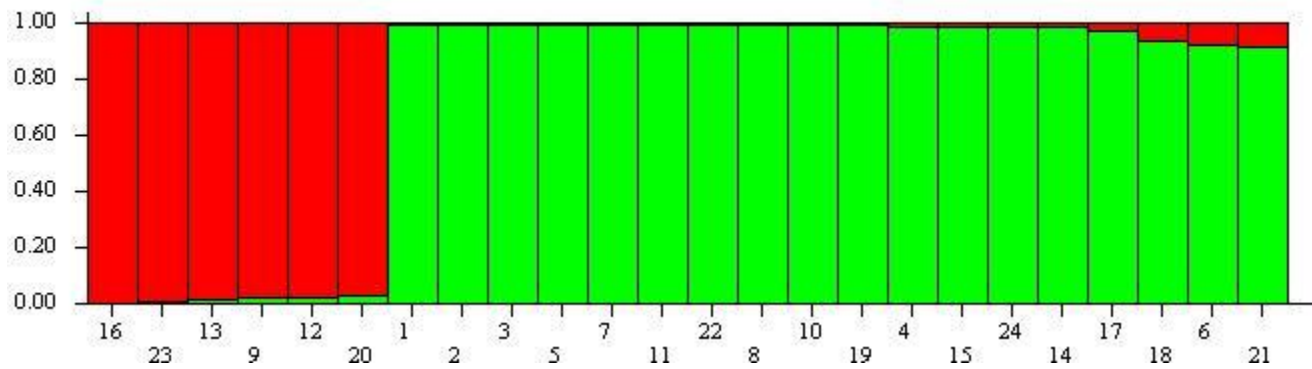

**Figure S1b** Structure analysis of *S. viminalis* when K = 2 clusters are assumed.

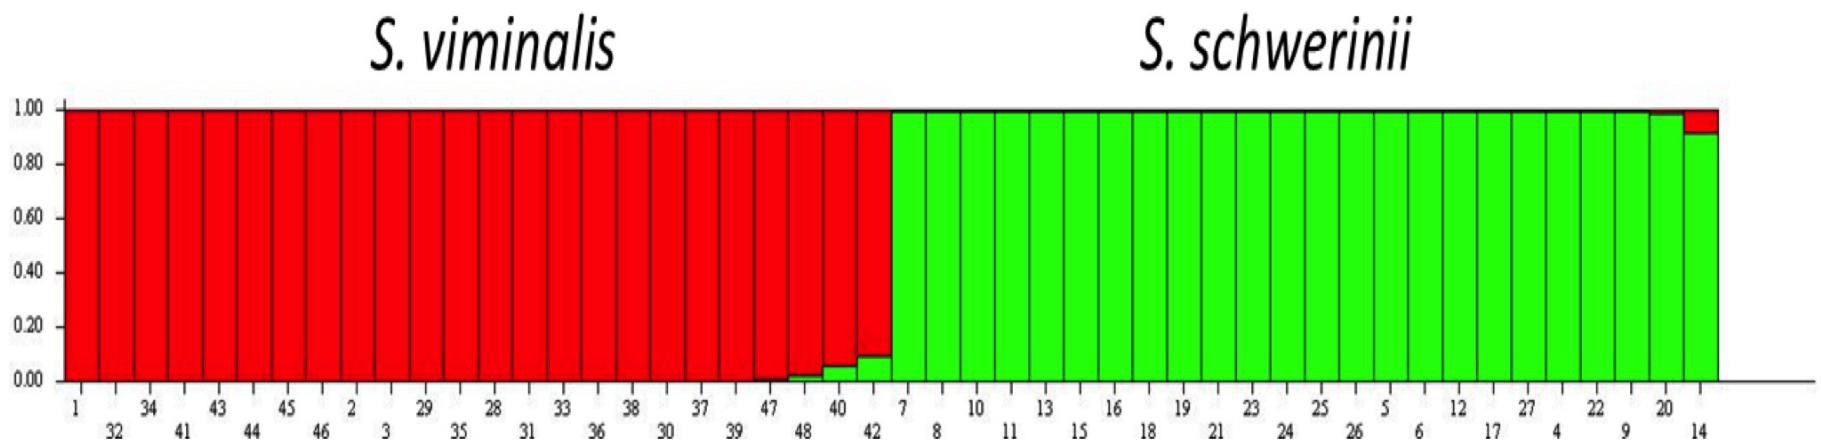

**Figure S1c** Structure analysis of *S. viminalis* and *S. schwerinii* when K = 2 clusters are assumed.
