# Supplementary material for: Polymorphism and Divergence in Two Willow Species, Salix viminalis L. and Salix schwerinii E. Wolf
Source: PubMed Central journal article supplement (PMC3276148; doi:10.1534/g3.111.000539), 2011-10-01
Supplement: supp_1.5.387_FigureS2.pdf [file supp_1.5.387_FigureS2.pdf]

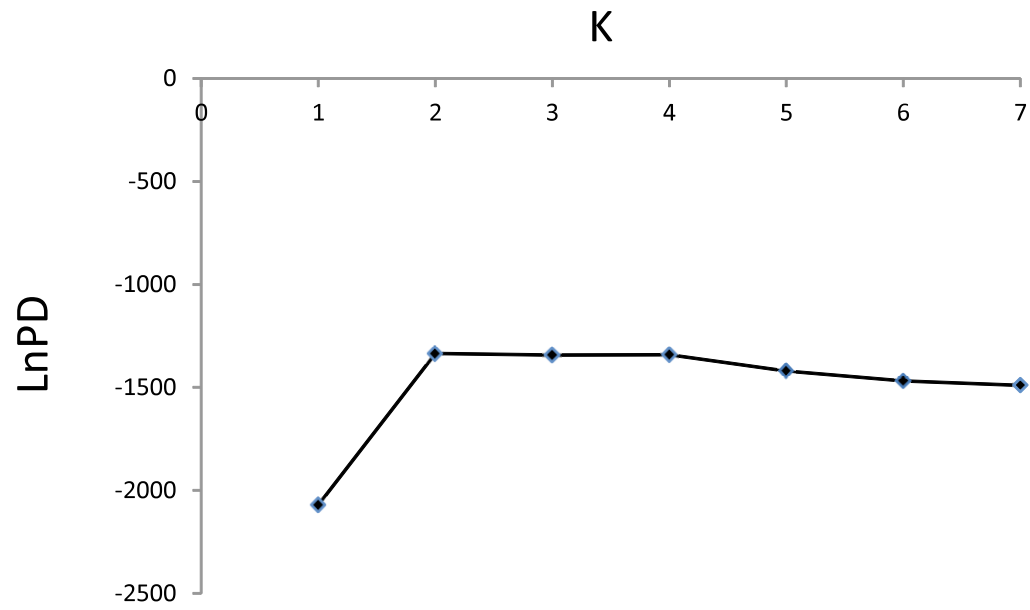

**Figure S2a** Estimated number of clusters (K) obtained with Structure when *S. schwerinii* and *S. viminalis* were run together. The mean LnPD is plotted over K (1-7).

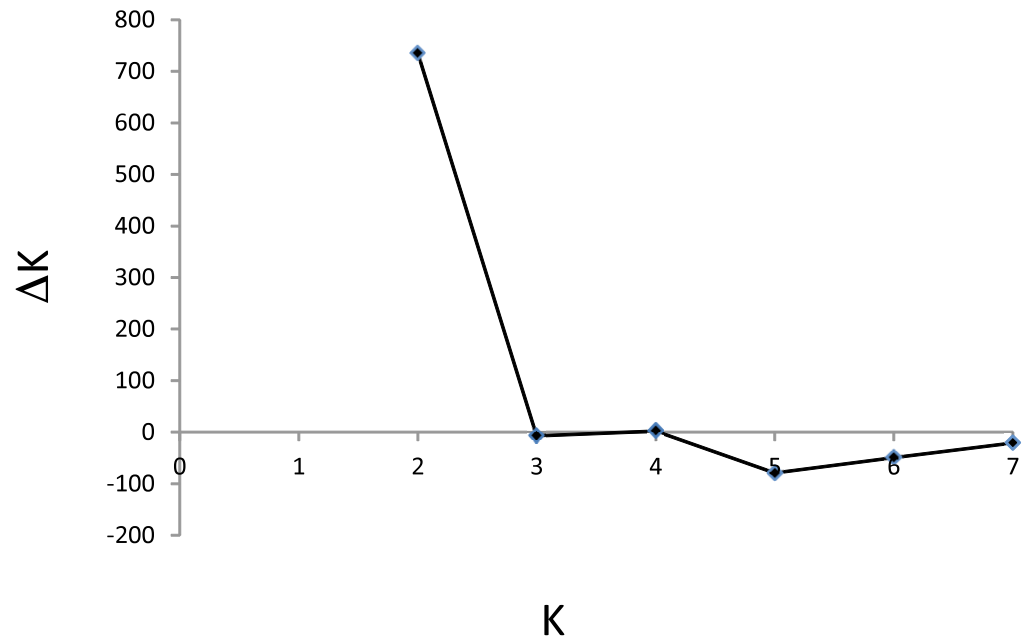

**Figure S2b** Estimated number of clusters ( $K$ ) obtained with Structure when *S. schwerinii* and *S. viminalis* were run together. The mean  $\Delta K$  is plotted over  $K$  (1-7).
