# Supplementary material for: Polymorphism and Divergence in Two Willow Species, Salix viminalis L. and Salix schwerinii E. Wolf
Source: PubMed Central journal article supplement (PMC3276148; doi:10.1534/g3.111.000539), 2011-10-01
Supplement: supp_1.5.387_TableS1.pdf [file supp_1.5.387_TableS1.pdf]

**Table S1 Sample origins and clone names**

| Species              | Lab name | Sample name | Origin                                                                      | Note     |
|----------------------|----------|-------------|-----------------------------------------------------------------------------|----------|
| <i>S. viminalis</i>  | V18      | 78183       | Skåne, Sweden                                                               |          |
| <i>S. viminalis</i>  | V19      | 78195       | Western Sweden                                                              |          |
| <i>S. viminalis</i>  | V52      | 81084       | Southeast Sweden                                                            |          |
| <i>S. viminalis</i>  | V8       | 78054       | Western Sweden                                                              |          |
| <i>S. viminalis</i>  | V14      | 78115       | Southeast Sweden                                                            |          |
| <i>S. viminalis</i>  | V32      | 80019       | North of malardalen Sweden                                                  |          |
| <i>S. viminalis</i>  | V40      | 80069       | Denmark                                                                     |          |
| <i>S. viminalis</i>  | V56      | 81102       | Netherland                                                                  |          |
| <i>S. viminalis</i>  | V59      | 82008       | Skåne, Sweden                                                               |          |
| <i>S. viminalis</i>  | V69      | 82046       | Ireland                                                                     |          |
| <i>S. viminalis</i>  | V76      | Bel34       | Belgium                                                                     |          |
| <i>S. viminalis</i>  | V85      | Bel74       | Belgium                                                                     |          |
| <i>S. viminalis</i>  | V94      | D161        | Germany                                                                     |          |
| <i>S. viminalis</i>  | V100     | D252        | Germany                                                                     |          |
| <i>S. viminalis</i>  | V117     | Linköp2A    | Sweden                                                                      |          |
| <i>S. viminalis</i>  | V119     | P63         | Poland                                                                      |          |
| <i>S. viminalis</i>  | V121     | P106        | Poland                                                                      |          |
| <i>S. viminalis</i>  | V126     | P182        | Poland                                                                      |          |
| <i>S. viminalis</i>  | V136     | skarp4      | Sweden                                                                      |          |
| <i>S. viminalis</i>  | V140     | T19         | Germany                                                                     |          |
| <i>S. viminalis</i>  | V142     | T76         | Germany                                                                     |          |
| <i>S. viminalis</i>  | V145     | T114        | Germany                                                                     |          |
| <i>S. viminalis</i>  | V147     | Öland7      | Öland, Sweden                                                               |          |
| <i>S. viminalis</i>  | V208     | 90040       | Sweden                                                                      |          |
| <i>S. schwerinii</i> | S1       | 96-1-40     | parents: SW910260 + SW910259 collected at river Ingoda at the bridge Tchita | F1 cross |
| <i>S. schwerinii</i> | S2       | 96-2-18     | parents: SW910261 + SW910267 collected at river Ingoda at the bridge Tchita | F1 cross |

|                      |     |          |                                                                                       |          |
|----------------------|-----|----------|---------------------------------------------------------------------------------------|----------|
| <i>S. schwerinii</i> | S3  | 96-5-6   | parents: SW910282 + SW910284 collected at river Mongoi, village Mohov-Kondin          | F1 cross |
| <i>S. schwerinii</i> | S4  | 96-6-15  | parents: SW910287 + SW910285 collected at river Mongoi, village Mohov Kondin          | F1 cross |
| <i>S. schwerinii</i> | S5  | 96-10-37 | parents: SW910301+ SW910300 collected at river Vitim village Romanovka                | F1 cross |
| <i>S. schwerinii</i> | S6  | 96-11-16 | parents: SW910312 + SW910317 collected at the rivers Vitim & Bisjaga, village Bodaibo | F1 cross |
| <i>S. schwerinii</i> | S7  | 96-12-3  | parents: SW910314 + SW910316 collected at the rivers Vitim & Bisjaga, village Bodaibo | F1 cross |
| <i>S. schwerinii</i> | S8  | 96-13-31 | parents: SW910323 + SW910324 collected at the rivers Vitim & Bisjaga, village Bodaibo | F1 cross |
| <i>S. schwerinii</i> | S9  | 96-14-40 | parents: SW910326 + SW910327 collected at river Tchitinka, village Tchita             | F1 cross |
| <i>S. schwerinii</i> | S10 | 96-16-31 | parents: SW910335 + SW910334 collected at river Tchitinka, village Tchita             | F1 cross |
| <i>S. schwerinii</i> | S11 | 96-19-14 | parents: SW910340 + SW910341 collected at rivers Shilka & Nertcha near to Nerchinsk   | F1 cross |
| <i>S. schwerinii</i> | S12 | 96-20-23 | parents: SW910343 + SW910344 collected at rivers Shilka & Nertcha near to Nerchinsk   | F1 cross |
| <i>S. schwerinii</i> | S13 | 96-21-20 | parents: SW910345 + SW910348 collected at rivers Shilka & Nertcha near to Nerchinsk   | F1 cross |
| <i>S. schwerinii</i> | S14 | 96-22-24 | parents: SW910349 + SW910350 collected at rivers Shilka & Nertcha near to Nerchinsk   | F1 cross |
| <i>S. schwerinii</i> | S15 | 96-24-11 | parents: SW910356 + SW910352 collected at rivers Shilka & Nertcha near to Nerchinsk   | F1 cross |
| <i>S. schwerinii</i> | S16 | 96-25-31 | parents: SW910368 + SW910369 collected at river Amur near Pokrova                     | F1 cross |
| <i>S. schwerinii</i> | S17 | 96-26-19 | parents: SW910371+ SW910372 collected at river Amur near Pokrova                      | F1 cross |
| <i>S. schwerinii</i> | S18 | SW911310 | collected at Vitim o Bisjaga                                                          |          |
| <i>S. schwerinii</i> | S19 | SW911295 | collected at river Vitim                                                              |          |
| <i>S. schwerinii</i> | S20 | SW911273 | collected at river Mongoi                                                             |          |
| <i>S. schwerinii</i> | S21 | SW911329 | collected at river Tchitinka                                                          |          |
| <i>S. schwerinii</i> | S22 | SW911283 | collected at river Mongoi                                                             |          |
| <i>S. schwerinii</i> | S23 | SW911347 | collected at rivers Shilka o Nertcha                                                  |          |
| <i>S. schwerinii</i> | S24 | SW911358 | collected at river Amur                                                               |          |
