# Supplementary material for: Polymorphism and Divergence in Two Willow Species, Salix viminalis L. and Salix schwerinii E. Wolf
Source: PubMed Central journal article supplement (PMC3276148; doi:10.1534/g3.111.000539), 2011-10-01
Supplement: supp_1.5.387_TableS2.pdf [file supp_1.5.387_TableS2.pdf]

**Table S2 Primer sequences**

| Gene   | Segment | Forward PCR primer 5' to 3' | Reverse PCR primer 5' to 3' |
|--------|---------|-----------------------------|-----------------------------|
| I-1    | I-1A    | TGATGGAAGACCTTTGTCTGG       | GTCCAGCACAGCCTTTTTGT        |
|        | I-1B    | CTTGTTTCGCAATCCAACACC       | GGTTTGCTTGTTTCCACTGTC       |
| I-53   | I-53B*  | CAGGTTTTGTGTGAGCTGGA        | AGCAGGGCTCAGTGAATTGT        |
| II-33  | II-33A  | AGGCTTTGCTTCTTTGGTCA        | GCTGGACTTCCCAACATTAG        |
|        | II-33B  | TAAGCATGTTTTACCTGTGC        | GCAGCATCCCTCAAATCAAT        |
| II-36  | II-36A  | TGCTGTTTATTTGTTGTATGCAC     | TCAGCAAATTGTAGCAAATGAA      |
|        | II-36B  | TGAAGCAACAGTCCAGGTG         | GGGTGAGGAAAAGTCAACCA        |
| III-4  | III-4A  | TTGTCTTCATGGTCGTGCAT        | CAGCTTCCATAAAGCGTTC         |
|        | III-4B  | ACTGGAGCTGTTGTGCCTTT        | CCACCAAGAGAGTGCCTTAC        |
| III-24 | III-24A | CCTGAATTGATGGCTGCATT        | CACTTAGGCCCGGCAAATT         |
|        | III-24B | ATGATGGACGCAACAAAAC         | TAGCCTTGGCCTCTTGAGAAG       |
| IV-11  | IV-11A  | TGGTCACCACAAATTCGTCT        | CATCTGCTGAGGACATGATTG       |
|        | IV-11B  | CATGCCTCTCTCGTTTCTC         | AGTGCAAGCATGGGAAGTTG        |
| IV-18  | IV-18A  | GTACAAGGCCGTGTTCTGT         | GCCATCGTCAGCTCAAAC          |
|        | IV-18B  | GAGTATCAGGAAATTGCAAGGC      | CTGCTGAAGCTGCTTAGCTG        |
| V-18   | V-18A   | TGCTATCATGTTGCCATGTG        | TGGGCAAGTTTCCATCATAAG       |
|        | V-18B   | GATTCTGGAATAGTCGATTC        | CAAGTTTCCATCATAAGTGC        |
| V-20   | V-20A   | CCAAGGCTTTTATGGTGCAT        | GAACTCCATCACCAAATTCCA       |
|        | V-20B   | GCATGCAAGAAACAGGGTTTAC      | AAGGATTGCATCCATTGCAG        |
| VI-4   | VI-4A   | CAAGGATTGCTTGCCATGT         | TGGCACAACAAATTCAGCTC        |
|        | VI-4B   | GTGCTTCCACTTCGTGACTG        | ATTGCAAATGGGACAGAACA        |
| VII-1  | VII-1A  | GGCAGCAGAACCAAAGAAGA        | TTCCTGGTGGCTAAAGTGGT        |
|        | VII-1B  | CGATCCTGATGCTGCTGATA        | GACAACAGTGGGAGCATCAA        |
| VII-11 | VII-11A | TTGGGAGAAGCTTTGCAACT        | GGTGCAAAAGCATTGTTGA         |
|        | VII-11B | ATTTTGGGCTTGGATTGTGA        | TTGAGGTACATTGGCAGCAA        |
| VIII-5 | VIII-5A | TGGATTTCTGGACCAGGCTAC       | GACAGGAGAATAGGAGCTTCG       |

|         |           |                       |                       |
|---------|-----------|-----------------------|-----------------------|
|         | VIII-5B   | TGCCATTCTACACCGAGTTG  | AACCTGAAACCAGAGCACAG  |
| VIII-14 | VIII-14A  | AAACTCCTGGAGAGGCAGG   | CTGCACAAAGTCCATGTAGTC |
|         | VIII-14B  | TGCTTGGTGCTGACTTTTATG | ATGACCGTAACACCAGATCG  |
| VIII-22 | VIII-22B* | TCATGTCATTGAGGGTCGAA  | TCCTGGTCTCCATCTGCATC  |
| X-27    | X-27A     | TGTCAATGCCAAACCTTGAA  | TTCAGTGGCTGGAACCTTCT  |
|         | X-27B     | ACAGCCAAAACCAACTCCG   | ATCTCTCGTGGCACCTATGGA |
| XII-8   | XII-8A    | GGCATATTCTCTCCCTTGATG | GGGAGCCAGTTACCACCATA  |
|         | XII-8B    | TGGTGACGATGAAGGCATTA  | GGGTTCAGTCTTTGGAAGCA  |

---

\*Only one segment per gene.
