# Supplementary material for: Polymorphism and Divergence in Two Willow Species, Salix viminalis L. and Salix schwerinii E. Wolf
Source: PubMed Central journal article supplement (PMC3276148; doi:10.1534/g3.111.000539), 2011-10-01
Supplement: supp_1.5.387_TableS3.pdf [file supp_1.5.387_TableS3.pdf]

**Table S3 P-values of obtaining multilocus summary statistic of the data under the individual species models. P-values are not corrected for multiple tests**

| Statistic            | <i>S. schwerinii</i> |        |         | <i>S. viminalis</i> |        |         |
|----------------------|----------------------|--------|---------|---------------------|--------|---------|
|                      | Bottleneck           | Growth | Neutral | Bottleneck          | Growth | Neutral |
| Mean(S)              | 0,85                 | 0,33   | 0,65    | 0,30                | 0,61   | 0,60    |
| Mean(num_singleton)  | 0,46                 | 0,08   | 0,20    | 0,08                | 0,13   | 0,13    |
| Mean( $\pi_w$ )      | 0,76                 | 0,23   | 0,47    | 0,24                | 0,48   | 0,46    |
| Mean(TajD)           | 0,99                 | 0,99   | 1       | 0,93                | 0,91   | 0,90    |
| Mean(FuLiF*)         | 0,99                 | 0,99   | 0,99    | 0,97                | 0,96   | 0,96    |
| Mean(FuLiD*)         | 0,95                 | 0,97   | 0,95    | 0,97                | 0,96   | 0,96    |
| Mean(num_haplotypes) | 0,76                 | 0,23   | 0,70    | 0,30                | 0,58   | 0,55    |
| Mean(DandVH)         | 0,68                 | 0,16   | 0,52    | 0,11                | 0,21   | 0,15    |
| Mean(WallsB)         | 0,61                 | 0,71   | 0,50    | 0,94                | 0,91   | 0,91    |
| Mean(WallsQ)         | 0,60                 | 0,64   | 0,46    | 0,95                | 0,94   | 0,94    |
| Var(S)               | 0,98                 | 0,94   | 0,97    | 0,82                | 0,88   | 0,88    |
| Var(num_singleton)   | 0,71                 | 0,41   | 0,54    | 0,35                | 0,50   | 0,49    |
| Var( $\pi_w$ )       | 0,60                 | 0,25   | 0,38    | 0,32                | 0,46   | 0,44    |
| Var(TajD)            | 0,88                 | 0,96   | 0,88    | 0,98                | 0,98   | 0,97    |
| Var(FuLiF*)          | 0,39                 | 0,53   | 0,41    | 0,77                | 0,74   | 0,75    |

|                     |      |      |      |      |      |      |
|---------------------|------|------|------|------|------|------|
| Var(FuLiD*)         | 0,13 | 0,20 | 0,14 | 0,66 | 0,64 | 0,66 |
| Var(num_haplotypes) | 0,92 | 0,92 | 0,95 | 0,91 | 0,90 | 0,90 |
| Var(DandVH)         | 0,23 | 0,60 | 0,37 | 0,88 | 0,80 | 0,82 |
| Var(WallsB)         | 0,50 | 0,76 | 0,48 | 0,69 | 0,57 | 0,55 |
| Var(WallsQ)         | 0,46 | 0,70 | 0,42 | 0,60 | 0,48 | 0,45 |

---
