# Supplementary material for: Polymorphism and Divergence in Two Willow Species, Salix viminalis L. and Salix schwerinii E. Wolf
Source: PubMed Central journal article supplement (PMC3276148; doi:10.1534/g3.111.000539), 2011-10-01
Supplement: supp_1.5.387_TableS4.pdf [file supp_1.5.387_TableS4.pdf]

**TABLE S4** Number of outlier loci in the validation of the per species ABC models. Loci were considered outlier when two-sided P-value < 0.05. P values are not corrected for multiple tests.

| Statistic            | S. schwerinii |        |         | S. viminalis |        |         |
|----------------------|---------------|--------|---------|--------------|--------|---------|
|                      | Bottleneck    | Growth | Neutral | Bottleneck   | Growth | Neutral |
| Segregating sites    | 2             | 1      | 2       | 1            | 1      | 1       |
| Singletons           | 0             | 0      | 0       | 0            | 0      | 0       |
| Wattersons theta     | 2             | 1      | 2       | 1            | 1      | 1       |
| Tajimas D            | 4             | 4      | 4       | 2            | 2      | 2       |
| Fu & Li F*           | 3             | 3      | 3       | 2            | 2      | 2       |
| Fu & Li D*           | 1             | 1      | 1       | 2            | 2      | 2       |
| Number of haplotypes | 1             | 1      | 1       | 2            | 2      | 3       |
