# Supplementary material for: Polymorphism and Divergence in Two Willow Species, Salix viminalis L. and Salix schwerinii E. Wolf
Source: PubMed Central journal article supplement (PMC3276148; doi:10.1534/g3.111.000539), 2011-10-01
Supplement: supp_1.5.387_TableS5.pdf [file supp_1.5.387_TableS5.pdf]

**Table S5** Outlier loci in the validation of ABC models. Number of statistics for which the loci were considered to be outlier at  $\alpha=0.05$  level, without correction for multiple tests.

| Locus   | Bottleneck | <i>S. schwerinii</i><br>Growth | Neutral | Bottleneck | <i>S. viminalis</i><br>Growth | Neutral | Split | Split without<br>migration | No split |
|---------|------------|--------------------------------|---------|------------|-------------------------------|---------|-------|----------------------------|----------|
| I-1     | 1          | 1                              | 1       | 3          | 3                             | 3       | 3     | 3                          | 6        |
| I-53b   |            |                                |         |            |                               |         |       |                            | 3        |
| II-33   |            |                                |         |            |                               |         |       |                            | 3        |
| II-36   |            |                                |         | 2          | 2                             | 2       |       |                            | 4        |
| III-4c  |            |                                |         |            |                               |         | 3     | 2                          | 3        |
| IV-11   |            |                                |         |            |                               |         |       |                            | 3        |
| IV-18   | 5          | 4                              | 5       |            |                               |         |       | 1                          | 7        |
| V-18b   |            |                                |         |            |                               |         |       |                            | 2        |
| VI-4    | 2          | 2                              | 2       | 3          | 3                             | 3       |       |                            | 5        |
| VII-11  | 3          | 3                              | 3       |            |                               | 1       | 3     | 1                          | 2        |
| VII-1   |            |                                |         | 2          | 2                             | 2       |       |                            | 3        |
| VIII-14 |            |                                |         |            |                               |         |       | 1                          | 2        |
| VIII-5  |            |                                |         |            |                               |         |       |                            | 2        |
| X-27    | 2          | 2                              | 2       |            |                               |         |       |                            | 4        |
