# Supplementary material for: Polymorphism and Divergence in Two Willow Species, Salix viminalis L. and Salix schwerinii E. Wolf
Source: PubMed Central journal article supplement (PMC3276148; doi:10.1534/g3.111.000539), 2011-10-01
Supplement: supp_1.5.387_TableS6.pdf [file supp_1.5.387_TableS6.pdf]

**Table S6** Number of outlier loci in the validation of the population split ABC models. Loci were considered outlier when two-sided P-value < 0.05. P values are not corrected for multiple tests.

| Statistic                                                       | Split | Split without migration | No split |
|-----------------------------------------------------------------|-------|-------------------------|----------|
| Segregating sites <i>S. schwerinii</i>                          |       |                         |          |
| Singletons <i>S. schwerinii</i>                                 |       |                         |          |
| Wattersons theta <i>S. schwerinii</i>                           |       |                         |          |
| Tajimas D <i>S. schwerinii</i>                                  |       |                         | 4        |
| Fu & Li F* <i>S. schwerinii</i>                                 |       |                         | 3        |
| Fu & Li D* <i>S. schwerinii</i>                                 |       | 1                       | 1        |
| Number of haplotypes <i>S. schwerinii</i>                       | 1     | 1                       |          |
| Segregating sites <i>S. viminalis</i>                           |       |                         |          |
| Singleton <i>S. viminalis</i>                                   |       |                         |          |
| Wattersons theta <i>S. viminalis</i>                            |       |                         |          |
| Tajimas D <i>S. viminalis</i>                                   | 1     | 1                       | 4        |
| Fu & Li F* <i>S. viminalis</i>                                  | 1     | 1                       | 3        |
| Fu & Li D* <i>S. viminalis</i>                                  | 1     | 1                       | 2        |
| Number of haplotypes <i>S. viminalis</i>                        |       |                         |          |
| Segregating sites <i>S. schwerinii</i> + <i>S. viminalis</i>    |       |                         |          |
| Singletons <i>S. schwerinii</i> + <i>S. viminalis</i>           | 2     |                         |          |
| Wattersons theta <i>S. schwerinii</i> + <i>S. viminalis</i>     |       |                         |          |
| Tajimas D <i>S. schwerinii</i> + <i>S. viminalis</i>            | 1     | 1                       | 2        |
| Fu & Li F* <i>S. schwerinii</i> + <i>S. viminalis</i>           | 1     | 1                       | 1        |
| Fu & Li D* <i>S. schwerinii</i> + <i>S. viminalis</i>           |       |                         | 1        |
| Number of haplotypes <i>S. schwerinii</i> + <i>S. viminalis</i> | 1     |                         |          |
| Fst                                                             |       | 1                       | 14       |
| Number of shared polymorphisms                                  |       |                         |          |
| Number of fixed polymorphisms                                   |       |                         | 14       |
| Number of private polymorphisms <i>S. schwerinii</i>            |       |                         |          |
| Number of private polymorphisms <i>S. viminalis</i>             |       |                         |          |
