# Supplementary material for: Polymorphism and Divergence in Two Willow Species, Salix viminalis L. and Salix schwerinii E. Wolf
Source: PubMed Central journal article supplement (PMC3276148; doi:10.1534/g3.111.000539), 2011-10-01
Supplement: supp_1.5.387_TableS7.pdf [file supp_1.5.387_TableS7.pdf]

**Table S7 P-values of obtaining multilocus summary statistic of the data under three different models. P values are not corrected for multiple tests.**

| Stat                                          | Split | Split no migration | No split |
|-----------------------------------------------|-------|--------------------|----------|
| Mean( $S_{S. schwerinii}$ )                   | 0.72  | 0.43               | 0.87     |
| Mean( $\text{singleton}_{S. schwerinii}$ )    | 0.71  | 0.47               | 0.86     |
| Mean( $\pi w_{S. schwerinii}$ )               | 0.67  | 0.36               | 0.87     |
| Mean( $\text{TajD}_{S. schwerinii}$ )         | 0.85  | 0.80               | 0.93     |
| Mean( $\text{FuLiF}^*_{S. schwerinii}$ )      | 0.72  | 0.57               | 0.88     |
| Mean( $\text{FuLiD}^*_{S. schwerinii}$ )      | 0.61  | 0.42               | 0.74     |
| Mean( $\text{num\_haplo}_{S. schwerinii}$ )   | 0.72  | 0.40               | 0.89     |
| Mean( $\text{DandVH}_{S. schwerinii}$ )       | 0.64  | 0.31               | 0.88     |
| Mean( $\text{WallsB}_{S. schwerinii}$ )       | 0.38  | 0.23               | 0.52     |
| Mean( $\text{WallsQ}_{S. schwerinii}$ )       | 0.39  | 0.22               | 0.54     |
| Mean( $S_{S. viminalis}$ )                    | 0.68  | 0.52               | 0.87     |
| Mean( $\text{singleton}_{S. viminalis}$ )     | 0.63  | 0.57               | 0.85     |
| Mean( $\pi w_{S. viminalis}$ )                | 0.65  | 0.48               | 0.86     |
| Mean( $\text{TajD}_{S. viminalis}$ )          | 0.46  | 0.25               | 0.79     |
| Mean( $\text{FuLiF}^*_{S. viminalis}$ )       | 0.59  | 0.38               | 0.80     |
| Mean( $\text{FuLiD}^*_{S. viminalis}$ )       | 0.64  | 0.46               | 0.75     |
| Mean( $\text{num\_haplo}_{S. viminalis}$ )    | 0.59  | 0.49               | 0.87     |
| Mean( $\text{DandVH}_{S. viminalis}$ )        | 0.45  | 0.32               | 0.86     |
| Mean( $\text{WallsB}_{S. viminalis}$ )        | 0.66  | 0.43               | 0.81     |
| Mean( $\text{WallsQ}_{S. viminalis}$ )        | 0.69  | 0.45               | 0.85     |
| Mean( $S_{\text{combined}}$ )                 | 0.61  | 0.44               | 0.88     |
| Mean( $\text{singleton}_{\text{combined}}$ )  | 0.73  | 0.53               | 0.87     |
| Mean( $\pi w_{\text{combined}}$ )             | 0.55  | 0.35               | 0.88     |
| Mean( $\text{TajD}_{\text{combined}}$ )       | 0.56  | 0.68               | 0.92     |
| Mean( $\text{FuLiF}^*_{\text{combined}}$ )    | 0.52  | 0.56               | 0.89     |
| Mean( $\text{FuLiD}^*_{\text{combined}}$ )    | 0.49  | 0.47               | 0.73     |
| Mean( $\text{num\_haplo}_{\text{combined}}$ ) | 0.68  | 0.42               | 0.91     |
| Mean( $\text{DandVH}_{\text{combined}}$ )     | 0.52  | 0.29               | 0.90     |

|                                          |      |      |      |
|------------------------------------------|------|------|------|
| Mean(WallsB <sub>combined</sub> )        | 0.23 | 0.18 | 0.54 |
| Mean(WallsQ <sub>combined</sub> )        | 0.24 | 0.19 | 0.55 |
| Mean(Fst)                                | 0.44 | 0.57 | 1.00 |
| Mean(shared)                             | 0.68 | 0.49 | 0.81 |
| Mean(fixed)                              | 0.30 | 0.26 | 1.00 |
| Mean(private <sub>S. schwerinii</sub> )  | 0.76 | 0.46 | 0.90 |
| Mean(private <sub>S. viminalis</sub> )   | 0.70 | 0.58 | 0.90 |
| Var(S <sub>S. schwerinii</sub> )         | 0.86 | 0.78 | 0.89 |
| Var(singleton <sub>S. schwerinii</sub> ) | 0.73 | 0.58 | 0.87 |
| Var( $\pi$ w <sub>S. schwerinii</sub> )  | 0.58 | 0.32 | 0.87 |
| Var(TajD <sub>S. schwerinii</sub> )      | 0.77 | 0.86 | 0.81 |
| Var(FuLiF* <sub>S. schwerinii</sub> )    | 0.44 | 0.57 | 0.52 |
| Var(FuLiD* <sub>S. schwerinii</sub> )    | 0.24 | 0.35 | 0.46 |
| Var(num_haplo <sub>S. schwerinii</sub> ) | 0.97 | 0.93 | 0.91 |
| Var(DandVH <sub>S. schwerinii</sub> )    | 0.26 | 0.52 | 0.45 |
| Var(WallsB <sub>S. schwerinii</sub> )    | 0.34 | 0.40 | 0.69 |
| Var(WallsQ <sub>S. schwerinii</sub> )    | 0.34 | 0.41 | 0.69 |
| Var(S <sub>S. viminalis</sub> )          | 0.78 | 0.65 | 0.88 |
| Var(singleton <sub>S. viminalis</sub> )  | 0.70 | 0.64 | 0.86 |
| Var( $\pi$ w <sub>S. viminalis</sub> )   | 0.60 | 0.42 | 0.86 |
| Var(TajD <sub>S. viminalis</sub> )       | 0.91 | 0.87 | 0.95 |
| Var(FuLiF* <sub>S. viminalis</sub> )     | 0.74 | 0.76 | 0.77 |
| Var(FuLiD* <sub>S. viminalis</sub> )     | 0.71 | 0.76 | 0.66 |
| Var(num_haplo <sub>S. viminalis</sub> )  | 0.66 | 0.62 | 0.90 |
| Var(DandVH <sub>S. viminalis</sub> )     | 0.54 | 0.65 | 0.82 |
| Var(WallsB <sub>S. viminalis</sub> )     | 0.48 | 0.36 | 0.74 |
| Var(WallsQ <sub>S. viminalis</sub> )     | 0.43 | 0.34 | 0.74 |
| Var(S <sub>combined</sub> )              | 0.90 | 0.87 | 0.89 |
| Var(singleton <sub>combined</sub> )      | 0.93 | 0.89 | 0.89 |
| Var( $\pi$ w <sub>combined</sub> )       | 0.39 | 0.23 | 0.87 |
| Var(TajD <sub>combined</sub> )           | 0.85 | 0.91 | 0.72 |

|                                        |      |      |      |
|----------------------------------------|------|------|------|
| Var(FuLiF* <sub>combined</sub> )       | 0.85 | 0.88 | 0.62 |
| Var(FuLiD* <sub>combined</sub> )       | 0.71 | 0.74 | 0.52 |
| Var(num_haplo <sub>combined</sub> )    | 0.98 | 0.95 | 0.92 |
| Var(DandVH <sub>combined</sub> )       | 0.60 | 0.73 | 0.42 |
| Var(WallsB <sub>combined</sub> )       | 0.31 | 0.40 | 0.69 |
| Var(WallsQ <sub>combined</sub> )       | 0.37 | 0.46 | 0.70 |
| Var(Fst)                               | 0.75 | 0.80 | 1.00 |
| Var(shared)                            | 0.76 | 0.61 | 0.86 |
| Var(fixed)                             | 0.28 | 0.24 | 1.00 |
| Var(private <sub>S. schwerinii</sub> ) | 0.89 | 0.81 | 0.90 |
| Var(private <sub>S. viminalis</sub> )  | 0.77 | 0.69 | 0.90 |

---
